# Supplementary material for: Biochar promotes soil aggregate stability and associated organic carbon sequestration, and regulates microbial community structures in Mollisols from Northeast China
Source: Copernicus journal article supplement (doi:10.5194/egusphere-2022-1084), 2022-11-04
Supplement: Supplementary file [file egusphere-2022-1084-RC2-supplement.pdf]

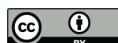

# Biochar promotes soil aggregate stability and associated organic carbon sequestration, and regulates microbial community structures in Mollisols from Northeast China

Jing Sun<sup>a,b</sup> Xinrui Lu<sup>a\*</sup> Guoshuang Chen<sup>a</sup> Nana Luo<sup>a</sup> Qilin Zhang<sup>a,b</sup> Xiujun Li<sup>a,b\*</sup>

<sup>a</sup> Key Laboratory of Wetland Ecology and Environment, Northeast Institute of Geography and Agroecology, CAS, Changchun

130102, China

<sup>b</sup> University of Chinese Academy of Sciences, Beijing 100049, China

\*Corresponding author, E-mail: [lixujun@iga.ac.cn](mailto:lixujun@iga.ac.cn); [luxinrui@iga.ac.cn](mailto:luxinrui@iga.ac.cn)

**Abstract:** Since the 1950s, heavy plowing of Mollisols, combined with a lack of organic matter intake, has resulted in severe soil degradation in Northeast China. The use of biochar in combination with fertilizer is a sustainable method of improving soil quality. In this paper, we conducted field experiments to explore the response of the stability mechanism of the soil aggregates, the dynamic properties of organic carbon, and changes in the microbial community structure to biochar. The biochar input levels were C1, C2, and C3 (9.8, 19.6, and 29.4 Mg·ha<sup>-1</sup>, respectively), while the nitrogen (N) fertilizer rates were N1/2 (300 kg·ha<sup>-1</sup>) and N (600 kg·ha<sup>-1</sup>). The field test showed that the C2N treatment increased the aggregate contents of the > 2 mm and 0.25–2 mm fractions by 56.59 and 23.41%, respectively. The mean weight diameter increased by 41.53%, while the geometric mean diameter increased by 21.62%. The organic carbon content of large aggregates shows a greater increase, with an average of 28.14%. The phospholipid fatty acids analysis revealed that bacteria (B) were the most prevalent organisms in the soil, followed by fungi (F). The C3N

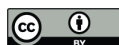

22 treatment increased the F/B ratio by 36.46%, whereas the C3 treatment increased the gram-positive  
23 (Gm<sup>+</sup>)/gram-negative (Gm<sup>-</sup>) ratio by 19.67%. We concluded that the response of Mollisols to  
24 biochar is primarily determined by the interplay of aggregates, organic carbon, and microorganisms.  
25 Based on the sequestration of SOC and the sustainability and stability of the ecosystem, we selected  
26 the optimal ratio for biochar and N fertilizer application and provide a scientific basis for the  
27 sustainable utilization of Mollisols resources.

28 **Keywords** biochar · nitrogen fertilizer · aggregate stability · organic carbon · microbial  
29 community · Mollisols

30  
31  
32  
33

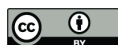

## 34 1 Introduction

35 Mollisols, considered the world's high-yield soils, are typically found in the northern and  
36 southern hemispheres in mid-latitudes and constitute about 7% of the world's soil resource base  
37 ((Zhang et al. 2018; Eswaran et al., 2011). However, Mollisols have been significantly degraded as  
38 a result of intensive, continuous cultivation and soil erosion, which leads to the destruction of the  
39 soil ecosystem as well as a vicious cycle of increased poor, with profound implications for global  
40 climate change (He et al. 2021; Antonello et al. 2019). Mollisols in China are mainly distributed in  
41 Heilongjiang and Jilin provinces, as one of the world's four major black soil regions, which has  
42 always been China's most important food production base (Mei et al. 2021; Zhang et al. 2018). The  
43 organic matter content of the Mollisols in Northeast China decreased by 30–50% from 1980 to 2011,  
44 which directly threatened the stability of the regional grain yields (Li et al. 2016). The principal  
45 manifestations of the decline in soil fertility and quality deterioration were a significant loss of soil  
46 organic carbon (SOC), a decrease in soil aggregation (Zhang et al. 2018), and degradation of soil  
47 structure (Luo et al. 2020; Zhang et al. 2019). The climate (Bottinelli et al. 2017), tillage (Xue et al.  
48 2019), microbial activities (Zhang et al. 2021), and SOC content, all affect the size, number, and  
49 composition of soil aggregates (Yin et al. 2018). The SOC can promote the formation of large  
50 aggregates in soils, and soil agglomeration can increase SOC storage. The interaction between  
51 carbon sequestration and aggregates stability can reduce soil nutrient loss, improve effective water  
52 holding capacity, increase crop yields, and mitigate global warming through lengthy soil carbon  
53 sequestration (He et al. 2021; Scow et al. 2017). It is critical to identify effective strategies to manage  
54 the soil in order to enhance its structure, increae its SOC content (Oksana et al. 2022; Plaza et al.

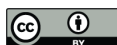

2016). Straw return has been demonstrated to be an effective approach for promoting SOC stabilization, improving soil aggregation, and influencing the structure of microbial communities by using organic amendment to promote (Xiu et al. 2019). However, direct straw return frequently causes problems, such as creating an adverse soil environment for crop sowing and root penetration (Li et al. 2019) and increasing the number of disease-causing pests and weeds (Wang et al. 2011) during the subsequent growing season. This is especially likely in high-latitude Chinese Mollisols, where straw decomposition time is very limited. Therefore, developing proper straw returns that can increase soil productivity has been a major challenge in this context.

Biochar is produced by pyrolyzing biomass at 400–700 °C in an oxygen-depleted environment (Xiu et al. 2019; Kung et al. 2015). The method has been promoted as a win-win technology for recycling straw while also potentially improving agricultural soils (Islam et al. 2021). Biochar can enhance SOC storage, soil granular structure, cation exchange capacity, and crop yield. For example, Wang et al. (2019) discovered that biochar improved the structural stability of Latosols in southern China. The aggregate mean weight diameter (MWD) and geometric mean diameter (GMD) were improved by 36.3 and 28.3%, respectively. Furthermore, Xiu et al. (2019) investigated the effect of corn stalk biochar application dose on Albic soils in northern. They discovered that a high biochar application level reduced the bulk density of Albic soils by 9.93% while increasing the pH value. Biochar was also found to significantly improve soil granular structure and organic carbon aggregation (Li et al. 2022). Thus, biochar had a favorable influence on soil quality and aggregation in these acidic soils, which could be attributed to the liming activity of biochar treatments on those acidic soils and the neutralization of the soil pH, which consequently had a significant effect on soil

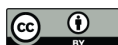

76 aggregation (Islam et al. 2021). Although the effect of biochar on soil agglomeration in neutral or  
77 alkaline soils has yet to be verified, some researchers believe there is no significant effect (Zhang  
78 et al. 2015). Furthermore, due to the low quantity of biochar minerals and inorganic nitrogen, several  
79 studies have indicated that only combination application with other fertilizers can improve soil  
80 fertility (Song et al. 2020). Chen et al. (2018) proposed that an 8-year manure amendment could  
81 recover soil nitrogen supplying capacity of lightly eroded Mollisols to natural levels. Therefore,  
82 biochar combined with an organic/inorganic fertilizer has the potential to improve soil fertility (Li  
83 et al. 2020), promote plant growth (Aneseyee et al. 2021; Mete et al. 2015), and carbon storage  
84 potential (Wang et al. 2019). Fungo et al. (2017) conducted a two-year field trial in the impoverished  
85 Ultisol of western Kenya and found that biochar combined with urea increased MWD by 13%,  
86 whereas biochar alone was less effective.

87 Principal ecological activities including organic matter formation and breakdown, nutrient  
88 cycling, and soil aggregate size redistribution are all controlled by soil microbial populations (Chen  
89 et al. 2022; Trivedi et al. 2017). Phospholipid fatty acid (PLFAs) are the main components of living  
90 cell membranes, which play an important role in maintaining cellular fluids, nutrient transportation,  
91 elimination of metabolites, etc. Changes in their components can more accurately express the  
92 response of soil microbial biomass and community structure to environmental disturbances (Zhang  
93 et al. 2013). The structure of the microbial community is closely related to the change of soil  
94 function (E.-I. et al. 2014). The higher the ratio of soil fungal to bacterial fatty acids, the more  
95 sustainable and stable the soil ecosystem (Wang et al. 2017). High  $G_m^+/G_m^-$  bacterial ratios  
96 facilitate soil organic carbon accumulation. Soil total nitrogen (TN) content is the main driver of



97 variations in the community composition (Zhang et al. 2021). Wang et al. (2021) discovered that  
 98 after using biochar in rice fields, the abundance of bacteria (B) and fungi (F) increased by 102 and  
 99 178%, respectively, which was likely related to an increase in soil total organic carbon (TOC), TN,  
 100 and rice biomass. According to the study of Chen et al. (2018), the improvement of microbial  
 101 community structure by biochar was clearly determined by the ratio of gram-positive ( $Gm^+$ )/gram-  
 102 negative ( $Gm^-$ ) and F/B in the paddy soil of central-southern China. In addition, Tian et al. (2016)  
 103 investigated the mechanism of interaction between biochar and mineral fertilizer addition on  
 104 microbial community and soil organic matter cycling in heavy loam soil. It was found that the  
 105 addition of biochar alone did not significantly improve microbial community structure and that its  
 106 effect on microbial community structure was dependent on fertilization. The ability of biochar and  
 107 nitrogen fertilizer to stimulate microbial activity is regulated by the soil conditions and application  
 108 rates (Palansooriya et al. 2019).

109 Soil organic carbon sequestration and microbial activity are critical for soil health and quality  
 110 regulation. However, the beneficial effects of biochar on soil aggregates, associated SOC, and  
 111 microbial activity have been observed primarily in nutrient-poor acidic soils (e.g. Ultisol and Albic  
 112 soils), and relevant studies on Mollisols in Northeast China have been limited. Furthermore, studies  
 113 on the combined application of biochar and nitrogen fertilizer are insufficient, limiting the scope of  
 114 production practice and theory. Therefore, this study using the northeast Mollisols as a pilot, the  
 115 objectives are to (1) explore the effects of three biochar gradients combined with N fertilizer on the  
 116 size, proportion, stability, and carbon content of Mollisols aggregates; (2) explore the influence  
 117 mechanism of biochar on microbial population structure and identify the major determinants for



118 microbial community composition changes; (3) develop scientific and effective field management  
119 measures for Mollisols by improving the structure of soil aggregates and microbial communities.

## 120 **2 Materials and methods**

### 121 *2.1 Site description*

122 The field experimental site was located at the test base of the Northeast Institute of Geography  
123 and Agroecology, Jilin Province (43° 59' 51" N, 125° 24' 5" E). The annual average temperature is  
124 4.6 °C, the precipitation is 600–700 mm, and the frost-free period during the whole year is 140–150  
125 d. For many years, continuous maize cropping has been carried out in conventional tillage patterns.  
126 The soil of the field was classified as Mollisols (Mei et al. 2021). The experimental surface soil pH  
127 was approximately 6.06, TN was 1.26 g·kg<sup>-1</sup>, available phosphorus was 26.78 mg·kg<sup>-1</sup>, available  
128 potassium was 133.54 mg·kg<sup>-1</sup>, and organic matter was 26.72 g·kg<sup>-1</sup>. The biochar was created by  
129 pyrolyzing corn straw at 400–500 °C for 4 h under anaerobic conditions. The biochar had a mean  
130 particle diameter of 0.003–3.5 mm, a surface area per volume of 0.7 m<sup>2</sup>g<sup>-1</sup>, and an ash concentration  
131 of 45% (Biochar particles need to pass through a 2 mm sieve before application). Also, the biochar  
132 had a pH of 9.16, the total carbon content was 62.64%, and the C/N was 39.08. The fertilizer was  
133 high-quality urea that was produced by Erdos Yi Ding Ecological Agriculture Development Co.  
134 Ltd., the TN was ≥ 46%, and the particle size range was 1.18–3.35 mm.

### 135 *2.2 Field experimental design*

136 A split zone design was adopted for the field experiment and three biochar input levels were  
137 set: 9.8 Mg·ha<sup>-1</sup> (C1), 19.6 Mg·ha<sup>-1</sup> (C2), and 29.4 Mg·ha<sup>-1</sup> (C3). Nitrogen was applied as a basal



138 fertilizer at rates of  $300 \cdot \text{kg} \cdot \text{N} \cdot \text{ha}^{-1}$  (N1/2) and  $600 \cdot \text{kg} \cdot \text{N} \cdot \text{ha}^{-1}$  (N). The CK treatment was used as a  
 139 control. In total, ten treatments were studied: CK, C1, C2, C3, C1N1/2, C2N1/2, C3N1/2, C1N,  
 140 C2N, and C3N. Each treatment was performed on a plot with the dimensions  $3.9 \times 6.5$  m, and each  
 141 treatment plot had a 1 m buffering zone. A randomized block design was used to conduct the three  
 142 replicate plots. Biochar with N fertilizer was applied to the soil in April 2013 and 2021, and corn  
 143 was sown in May 2013 and 2021.

### 144 2.3 Soil bulk density and water content

145 On October 29, 2021, after the corn harvest was complete, soil samples were obtained from  
 146 each plot using the five-point sampling method, which involved taking 1 kg of soil samples from  
 147 each plot. Undisturbed soil columns were collected using a soil drill and were placed into ziplocked  
 148 bags after the removal of plant and animal residues. Some of the soil was promptly refrigerated at  
 149  $4^\circ \text{C}$  for PLFA measurement. A 5 mm mesh screen was used to remove the water-stable soil  
 150 aggregates from the rest of the sample, which was then allowed to dry naturally. For the  
 151 determination of the bulk TOC, subsamples of 2 mm soil particles were passed through a 0.15 mm  
 152 filter after being air-dried. The TOC in the aggregate fractions was determined by  $\text{K}_2\text{Cr}_2\text{O}_7$  titration  
 153 (Chen et al. 2018). Next, the surface (0-10 cm) and bottom (10-20 cm, 20-40 cm) soils were sampled  
 154 with a cutting ring ( $V = 100 \text{ cm}^3$ ) and dried at  $105^\circ \text{C}$  for 24 h to measure the soil bulk density and  
 155 water content using the following formulae:

$$156 \quad X = \frac{m_2 - m_1}{m} \times 100\% \quad (1)$$

$$157 \quad \rho_b = \frac{m}{V} \quad (2)$$

158 where  $X$  is the field water holding capacity (%),  $\rho_b$  is the soil bulk density ( $\text{g} \cdot \text{cm}^{-3}$ ),  $m$  is the



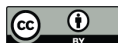

dry soil weight (g),  $v$  is the cutting ring volume ( $\text{cm}^3$ ),  $m_2$  is the total weight of the cutting ring and soil after 2 h on dry sand, and  $m_1$  is the total weight of the cutting ring and soil after drying.

#### 2.4 Soil water-stable aggregate analysis and calculation

In this experiment, the soil aggregates were fractionated utilizing a modified version of the wet sieving method which was given by Zhang et al. (2018). The dry soil sample (100 g) was uniformly coated on automatic vibrating sleeve screens of 2, 0.25, and 0.053 mm in diameter.

The formula for calculating the mass fraction of the water-stable aggregates is as follows:

$$W_t = M_i M_t \times 100\% \quad (3)$$

where  $W_i$  is the percentage of the component weight of the  $i$ th sized aggregate.

The MWD and GMD represent the size distribution of the soil aggregates. The larger the value, the higher the agglomeration degree and the stronger the stability. The formulas are as follows:

$$\text{MWD} = \sum X_j W_j \quad (4)$$

$$\text{GMD} = \text{Exp} \left[ \frac{\sum_{i=1}^n (M_i \ln X_i)}{\sum_{i=1}^n M_i} \right] \quad (5)$$

where  $j$  is the aggregate size,  $X_j$  is the average diameter of the particle size,  $W_j$  is the ratio of the aggregate sample weight of each particle size on the screen,  $X_i$  is the average diameter of a size  $i$  aggregate,  $M_i$  is the weight of a size  $i$  aggregate, and  $M_t$  is the total weight of all the aggregates.

The aggregate content was determined as follows:

$$R_{0.25} = \frac{M_{r > 0.25}}{M_T} \quad (6)$$

where  $R_{0.25}$  is the aggregate content (%) with an aggregate size of  $> 0.25$  mm,  $M_{r > 0.25}$  is the weight of the soil aggregates that are  $> 0.25$  mm, and  $M_T$  is the total weight of all the aggregate fractions.



180 The formula for the soil carbon contribution rate of each aggregate grain size is as follows:

$$181 \quad C_C = \frac{w_i \times C_i}{C_s} \times 100\% \quad (7)$$

182 where  $C_C$  represents the contribution rate of each particle size aggregate to the carbon level in  
 183 the soil sample,  $w_i$  is the weight percent (%) of the  $i$ -sized aggregate component,  $C_i$  is the organic  
 184 carbon content of the soil aggregates at size  $i$ , and  $C_s$  represents the soil TOC content.

### 185 2.5 Phospholipid fatty acid analyses

186 The PLFA analysis is a crucial technique for identifying microbes and analyzing the  
 187 community structure. It may be more responsive to changes in the relevant microbial ecology when  
 188 compared to other approaches (Antoniotti et al. 2009). The PLFA extraction method used in this  
 189 study was described by Luo et al. (2017). The nonadecanoic acid methyl ester (19:0) was employed  
 190 as an endogenous control. The identified PLFAs were classified into specific microbiota: bacteria  
 191 (i15:0, a15:0, 15:0, i16:0, 16:1  $\omega$ 5, 16:1  $\omega$ 9, i17:0, 17:0, a17:0, cy17:0, and cy19:0); fungi (18:2 $\omega$ 6c  
 192 and 18:3 $\omega$ 6c); actinomycetes (16:1 $\omega$ 7c, 17:1 $\omega$ 8c, and 18:1 $\omega$ 7c); Gm<sup>+</sup> bacteria (i14:0, a15:0, i15:0,  
 193 i16:0, a17:0, and i17:0); and Gm<sup>-</sup> bacteria (16:1 $\omega$ 7c, 16:1 $\omega$ 9c, cy17:0, 17:1 $\omega$ 8c, 18:1 $\omega$ 7c, and  
 194 cy19:0) (Luo et al. 2017).

195 The concentration of the target PLFAs in the sample was calculated as follows:

$$196 \quad C_{PLFA} = \frac{F_{PLFA}}{F_{IS}} \times \frac{C_{IS}}{M_{PLFA}} \times \frac{V}{m} \quad (8)$$

197 where  $C_{PLFA}$  is the concentration of the target PLFA (nmol·g<sup>-1</sup>),  $F_{PLFA}$  is the peak area for the  
 198 PLFAs,  $F_{IS}$  is the area of the internal standard peak,  $C_{IS}$  is the internal standard concentration (25  
 199 ng·μl<sup>-1</sup>),  $M_{PLFA}$  is the molecular weight of the target PLFA,  $V$  is the sample dissolution volume (120  
 200 μl), and  $m$  is the soil weight (4 g).



## 201 2.6 Statistical analyses

202 IBM Statistics SPSS 22.0 software was used to test the data normality and homogeneity and  
 203 conduct a principal component analysis (PCA). An analysis of variance (ANOVA) was performed  
 204 to determine the significant differences between the treatments in R ( $P < 0.05$ ). If the data did not  
 205 meet the criteria, a nonparametric Kruskal-Wallis test was performed to determine the statistical  
 206 significance. Canoco 5 (Windows Release 5.02 trial version) software was used for redundancy  
 207 analysis (RDA), and fitting and mapping were conducted using Origin Pro 9.0.

## 208 3 Results

### 209 3.1 Soil physical properties

210 The biochar had a substantial impact on the soil (0–10 cm) bulk density ( $P < 0.05$ ; Fig. 1), but  
 211 its coupling effect with N fertilizer was not significant. Also, soil bulk density showed distinct  
 212 regularities in all profiles and increased with soil depth. The C2N1/2 treatment had the greatest  
 213 improvement effect of all treatments, and the soil bulk densities of the 0–10, 10–20, and 20–40 cm  
 214 layers decreased by 13, 8, and 3%, respectively. The surface soil (0–10 cm) had the highest moisture  
 215 content in the original profiled soil, while the 10–20 cm soil had the lowest water content.  
 216 Additionally, there was a substantial positive relationship between biochar application amount and  
 217 the soil water content in the profile ( $P < 0.01$ ; Fig. 1), with the C3 treatment improving the most  
 218 when compared to the CK. Furthermore, the soil moisture content increased by 15–35%. The two-  
 219 factor ANOVA (Table S1) showed that biochar significantly improved soil water content ( $P < 0.01$ )  
 220 and that the biochar contributed significantly to soil bulk density and water content.

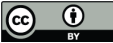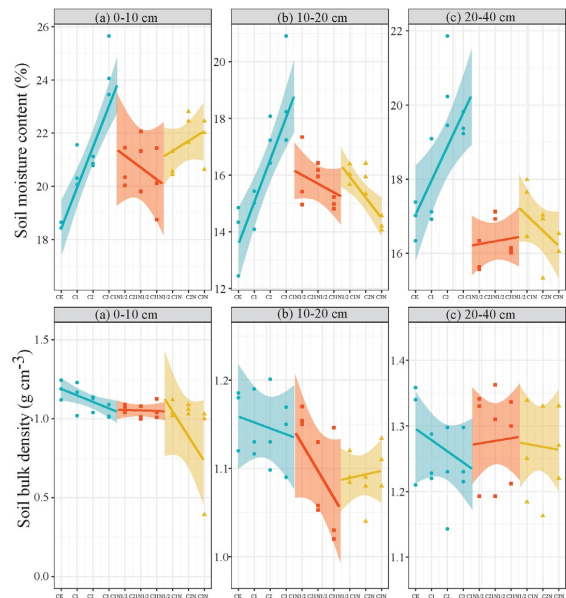

Figure 1 The effects of biochar and nitrogen fertilizer on the soil bulk density and soil moisture content in the soil profile.

### 3.2 Soil aggregation

The proportions of soil aggregates in descending order were as follows: microaggregates (0.053–0.25 mm), small aggregates (0.25–2 mm), silt and clay (< 0.053 mm), and large aggregates (> 2 mm; Fig. 2). First, the number of macroaggregate components was lower in the bottom soil (10–40 cm) than in the surface soil. Second, the biochar considerably increased the percentage of large aggregates (11.59–50.40%) while decreasing the percentage of < 0.053 mm aggregates (5.12–38.66%). Third, the combined application had a synergistic effect, and the proportion of macroaggregates continued to increase (38.98–56.59%) before stabilizing.

According to the interactive analyses, N fertilizer had a greater effect on the fraction of macroaggregates in the profile (Table S2). The C2N treatment increased the > 2 and 0.25–2 mm

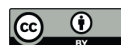

234 fractions of soil aggregates by 56.59 and 23.41%, respectively. Furthermore, the proportions of  
 235 aggregates 0.053–0.025 and < 0.053 mm decreased by 4.09 and 43.64%, respectively. The C2N  
 236 treatment had the highest growth rate of large aggregates within the 0–10 cm layer, which was 3.66  
 237 and 20.16% higher than that of the C2N1/2 and C2 treatments, respectively. The quantity of soil  
 238 aggregates with each profile showed the same trend (Fig. 2b and c). Furthermore, as soil depth  
 239 increased, the water-stable aggregates were gradually replaced with 0.053–0.25 mm sized  
 240 aggregates (35.95–46.42%).

241 The MWD, GMD, and  $R_{0.25}$  values increased significantly as the biochar addition ratios  
 242 increased (Fig. 3). The increasing trend in the stability index was more noticeable after the  
 243 application of biochar together with fertilizer. Additionally, the  $R_{0.25}$  values of the 0–10, 10–20, and  
 244 20–40 cm soil layers increased by 30.33, 57.90, and 17.70%, respectively, and the MWD increased  
 245 by 28.22, 50.37, and 46.01%, respectively in this treatment. The GMD then increased by 18.32,  
 246 29.43, and 17.71%, respectively.

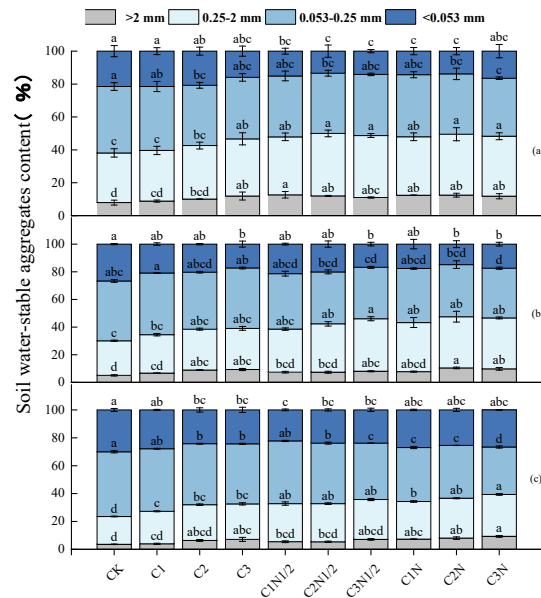

Figure 2 The size distribution of the soil aggregates at 0–10 cm (a), 10–20 cm (b), and 20–40 cm (c). The letters indicate significant differences among various treatments ( $P < 0.05$ ). The bars indicate the standard error.

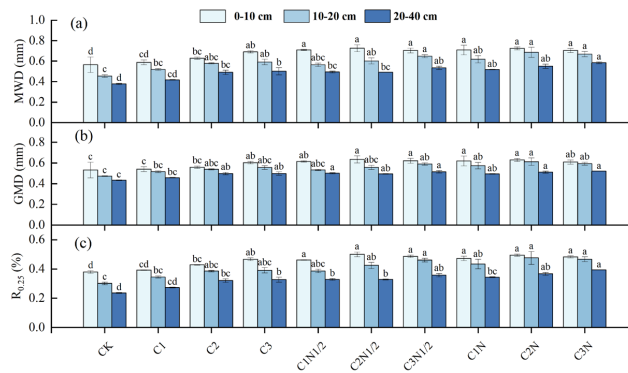

Figure 3 The aggregate content with an aggregate size of  $> 0.25$  mm ( $R_{0.25}$ ), mean weight diameter (MWD), and geometric mean diameter (GMD) of the soil aggregates under different treatments. The letters indicate significant differences between the various treatments ( $P < 0.05$ ). The bars indicate the standard error.

### 3.3 Total organic carbon distribution in the bulk soil and aggregate fractions

The average TOC content of the surface layer was 20.26% higher than that of the 20–40 cm



256 soil layer (Fig 4). The TOC content was significantly correlated with the application rates of the  
257 biochar and nitrogen fertilizer ( $P < 0.01$ ). Among all the treatments, the C3N treatment in  
258 comparison to the CK resulted in the greatest increase in organic carbon content, and the TOC  
259 increased by 35.59, 30.62, and 29.53% in the soil profile from top to bottom.

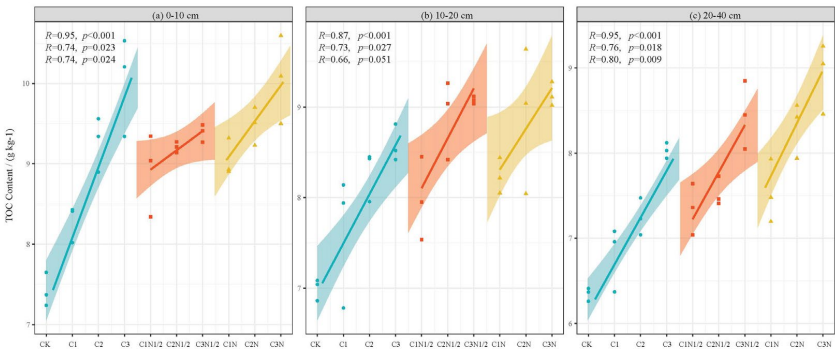

260  
261 Figure 4 The total organic carbon (TOC) of the soil profile under different treatments.

262 The TOC was significantly associated with aggregate fractions of  $> 2$  mm and 0.25–2 mm but  
263 inversely associated with fractions of 0.25–0.053 mm and 0.053 mm aggregates (Fig. 5). We also  
264 compared the TOC of the particle size components of the various aggregates under different biochar  
265 treatments (Fig. 6 a, b, and c) and found that large aggregates had higher carbon content than  
266 microaggregates. The C3+N1/2 treatment increased the TOC content in the  $> 2$  mm, 2–0.25 mm,  
267 0.25–0.053 mm, and  $< 0.053$  mm fractions by 36.89, 20.39, 15.41, and 16.14% respectively ( $P <$   
268 0.05). Furthermore, the 0.25–2 mm aggregate fractions contributed the most to TOC, followed by  
269 the  $> 2$  mm fractions (Fig. 6 d, e, and f). The contribution rate of the C+N treatment to the TOC did  
270 not change significantly when compared to the C+N1/2 treatment.

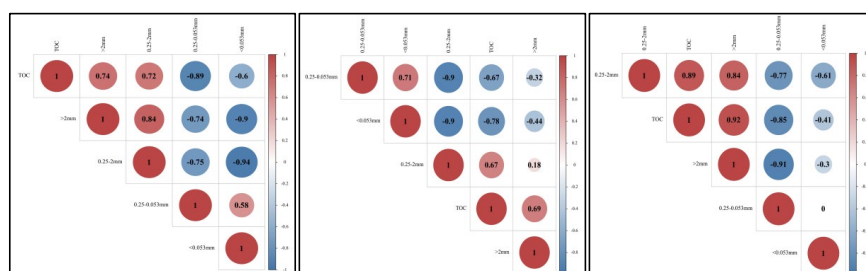

Figure 5 The correlation between the total organic carbon (TOC) and the aggregate contents of the different particle sizes in the soil profile (from left to right: 0–10 cm, 10–20 cm, and 20–40 cm).

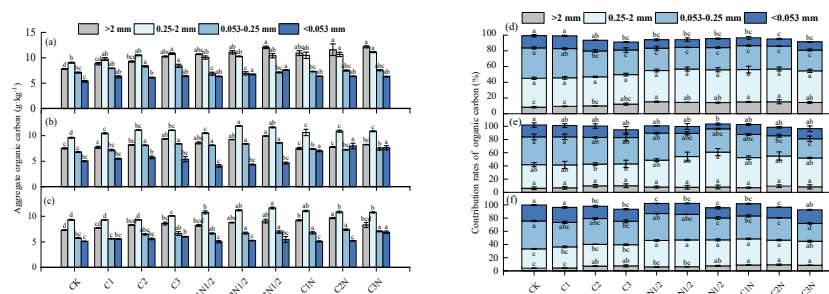

The total organic carbon (TOC) levels of the four aggregate fractions: (a) 0–10 cm, (b) 10–20 cm, and (c) 20–40 cm; the contribution rates of the aggregate fractions to the TOC: (d) 0–10 cm, (e) 10–20 cm, and (f) 20–40 cm. The letters indicate significant differences among various treatments ( $P < 0.05$ ) for a given aggregate fraction. The bars indicate the standard error.

### 3.4 Microbial community structure

The PLFAs of microorganisms (i.e., bacteria, fungi, actinomycetes,  $Gm^+$  bacteria, and  $Gm^-$  bacteria) in the soil were identified (Fig. 7). The biochar treatment resulted in the highest increases in F/B and  $Gm^+/Gm^-$  proportions of 28.17 and 7.91%, respectively (Fig. 7 g and h). Also, the two-factor ANOVA (Table S3) showed that N fertilizer effectively altered the abundance of microorganisms, with the exception of fungi and  $Gm^-$  bacteria ( $P < 0.05$ ). The abundances of the





285 bacteria, fungi, actinomycetes,  $Gm^+$ , and  $Gm^-$  in the C3N1/2 treatment increased by 36.10, 72.35,  
286 100.72, 14.91, and 12.72%, respectively. The total PLFAs increased by 56.12%.

287 The RDA was performed to determine the relationship between soil environmental change and  
288 the PLFA response variables (Fig. 8). The two RDA axes were significant, accounted for 94.12%  
289 of the overall variation in the soil microbial characteristics. The first axis explained 85.83 % of the  
290 total variation in microbial community composition, while the second axis explained 8.29%. Soil  
291 bulk density was the most significant variable, accounting for 62.61% of the microbial community  
292 characteristics, followed by MWD, soil moisture, TOC,  $R_{0.25}$ , and GMD, all of which were  
293 significantly correlated with the microbial community composition and explained 15.90, 13.42, 4.01,  
294 2.83, and 1.28% of the various rates of microbial PLFAs, respectively.

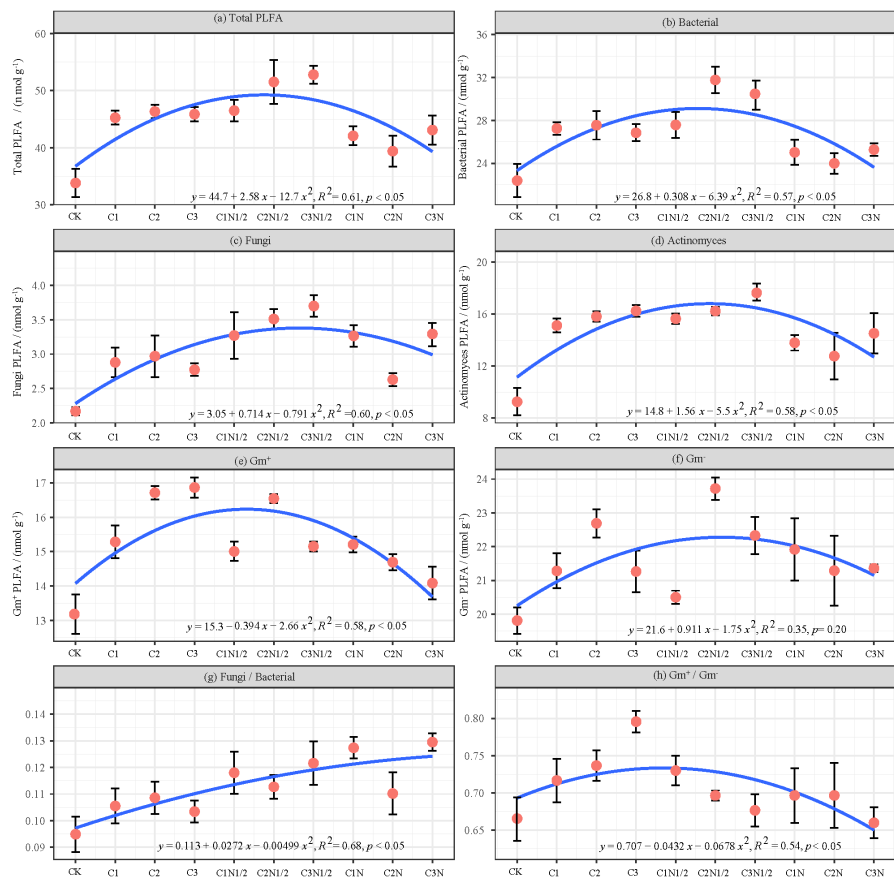

295  
296 Figure 7 The concentration of the (a) total phospholipid fatty acids (PLFAs; nmol·g<sup>-1</sup>), (b) bacteria PLFAs, (c)  
297 fungi PLFAs, (d) actinomycetes PLFAs, (e) gram-positive bacteria (Gm<sup>+</sup>) PLFAs, (f) gram-negative bacteria  
298 (Gm<sup>-</sup>) PLFAs, (g) ratio of the bacteria PLFAs/fungi PLFAs (F/B), and (h) ratio of the Gm<sup>+</sup> to Gm<sup>-</sup> bacteria of the  
299 microbial community in the soils under the treatments.

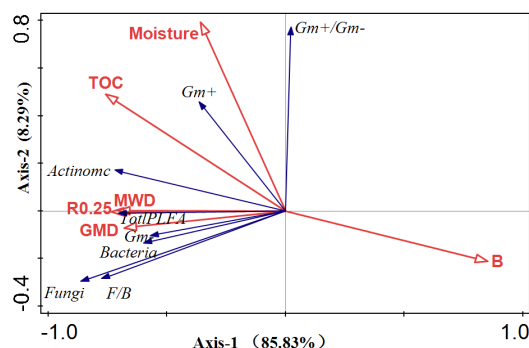

Figure 8 A redundancy analysis was used to clarify the relationship between the soil parameter variables and microbial communities. The red arrows represent the explanatory variables (soil physicochemical properties), and the blue vectors represent the response variables (phospholipid fatty acid biomass).

The PCA was used to evaluate the effects of various treatments on the soil traits in Northeast China (Table 1, Table S4). The results showed that the cumulative variance contribution rate was 90.13%, which adequately explained the variation. The higher the F value, the better the improvement effect, and the C2N1/2 treatment was optimal.

The expression of the principal component is as follows:

$$F1 = 0.27X1 + 0.31X2 + 0.31X3 + 0.30X4 + 0.23X5 + 0.23X6 + 0.27X7 + 0.08X8 + 0.31X9 + 0.33X10 + 0.32X11 + 0.31X12 - 0.35X13 + 0.20X14 \quad (9)$$

$$F2 = 0.25X1 - 0.09X2 + 0.22X3 + 0.22X4 - 0.38X5 + 0.45X6 + 0.16X7 + 0.46X8 - 0.05X9 - 0.24X10 - 0.25X11 - 0.27X12 + 0.15X13 + 0.16X14 \quad (10)$$

$$F3 = 0.34X1 + 0.35X2 + 0.20X3 + 0.29X4 + 0.14X5 - 0.09X6 + 0.21X7 - 0.36X8 - 0.28X9 - 0.13X10 - 0.16X11 - 0.13X12 + 0.19X13 - 0.52X14 \quad (11)$$

$$F = (56.52\%/90.13\%) \times F1 + (18.41\%/90.13\%) \times F2 + (15.20\%/90.13\%) \times F3 \quad (12)$$

where X1–X14 represent the bacteria PLFAs, fungi PLFAs, actinomycetes PLFAs, total PLFAs,



317 F/B,  $Gm^+$ ,  $Gm^-$ ,  $Gm^+/Gm^-$ , TOC,  $R_{0.25}$ , MWD, GMD, B, and moisture, respectively.

318 Table 1 The principal component evaluation values and comprehensive evaluation values.

| Treatments | F1    | F2    | F3    | F     | Rank |
|------------|-------|-------|-------|-------|------|
| CK         | -7.03 | -0.53 | 0.32  | -4.46 | 10   |
| C1         | -2.45 | 1.78  | 1.04  | -1.00 | 9    |
| C2         | -0.17 | 2.11  | 0.42  | 0.39  | 4    |
| C3         | 1.52  | 2.12  | -2.74 | 0.92  | 3    |
| C1N1/2     | 0.55  | -0.36 | 0.12  | 0.29  | 5    |
| C2N1/2     | 3.47  | 0.68  | 0.85  | 2.46  | 1    |
| C3N1/2     | 2.59  | -0.44 | 2.35  | 1.93  | 2    |
| C1N        | 0.61  | -1.50 | -0.06 | 0.06  | 7    |
| C2N        | -0.13 | -1.48 | -1.98 | -0.72 | 8    |
| C3N        | 1.06  | -2.36 | -0.32 | 0.13  | 6    |

## 319 4 Discussion

### 320 4.1 The effects of the biochar and nitrogen fertilizer treatments on soil physical properties

321 The soil quality can be determined by its bulk density. This study found that the poor condition  
 322 of the original soil was altered by the addition of biochar. As a result, with a microporous and carbon-  
 323 rich structure for preventing oxidative degradation, the bulk density of the surface was dramatically  
 324 reduced, but not in the bottom soil (Xiu et al. 2019). The biochar had a slow and gradual effect on  
 325 the soil improvement. According to Chaganti et al. (2015), the biochar in the soil will gradually  
 326 migrate to the lower soil over time due to natural factors and human activities. Also, Luo et al. (2020)  
 327 concluded that biochar was often applied to the surface layer, resulting in a greater decline in the  
 328 bulk density of the surface soil than the underlying soil. This suggests that biochar has a great benefit  
 329 in ameliorating soil compaction problems in modern agriculture. Our study also found a  
 330 considerably strong correlation between the soil water content of the Mollisols and the amount of



331 biochar applied, particularly in the topsoil. An et al. (2022) discovered through CT scanning, that  
332 after the addition of biochar, soil porosity decreased, pore size decreased, and water retention  
333 increased, implying that water was stored in smaller pores in the soil, and drainage was delayed.  
334 One possible explanation is that the porosity, hydrophilic domains, and huge specific surface area  
335 of biochar may aid in water retention. However, some studies contradicted this study, and found  
336 either reduced water retention capacity (Madari et al. 2017) or no effect (Baiaumont et al. 2015)  
337 after biochar application. The variation in the actions may be attributed to biochar properties, soil  
338 texture type, climate change, and experimental design and duration

#### 339 4.2 The effects of biochar and nitrogen fertilizer on soil aggregate distribution and stability

340 Soil aggregation is essential for the performance of soil functions and is primarily responsible  
341 for the formation of the soil structure (Zhang et al. 2018). In this study, biochar increased the  
342 formation of macroaggregates (>0.25 mm), especially small macroaggregates (0.25–2 mm), but  
343 decreased the number of microaggregates in Mollisols. Grunwald et al. (2016) also confirmed this  
344 point by treating Haplic Phaeozem and Gleyic Luvisol with biochar in field experiments. Our  
345 findings also showed that when biochar was combined with N fertilizer, the fraction of  
346 macroaggregates steadily increased while the content of the microaggregates and clay particles  
347 decreased (Fig. 2). Field studies revealed a favorable influence on soil aggregation in sandy loam to  
348 clayey soils (Du et al. 2017). Therefore, the surface hydrophobic-hydrophilic interactions between  
349 clay minerals and biochar particles, as well as the biochar ability to integrate with the soil biota, and  
350 labile carbon, may all contribute to soil aggregation (Joseph et al. 2010). Furthermore, surface area,



351 microporous structure, and O/C ratio are key biochar features for binding to organo-mineral  
 352 complexes, an initial stage in aggregate formation and stability (Du et al. 2017).

353 Long-term field trials appear to have improved the effect of on soil aggregation (Dong et al.  
 354 2016). According to the findings of this study, the soil aggregate stability increased by 10.9–23.49%,  
 355 which is consistent with the findings of a meta-analysis (Peng et al. 2015). The initial TOC level  
 356 ( $26.72 \text{ g} \cdot \text{kg}^{-1}$ ) and protracted field experiments (8 years) with large effects could explain this. In a  
 357 laboratory incubation experiment, the Albic soil of Northeast China had the lowest (0.7–4.4%) soil  
 358 aggregation stability (Xiu et al. 2019). Our data showed that biochar improves the agglomeration of  
 359 Mollisols better than Albic soil. This could be due to the lower initial SOC and shorter biochar  
 360 application time (2 years) in our study, which is consistent with Demisie et al. (2014). According to  
 361 the MWD (Fig. 3), increased TOC and microbial biomass (Fig. 7) were responsible for the  
 362 significant increase in aggregation caused by biochar addition. This was also found to be the case  
 363 in other studies, which found that biochar served as a cementing material, assisting more  
 364 microaggregates, silt, and clay components to cement together into larger soil aggregates (Xu et al.  
 365 2019). Biochar improved water-stable soil aggregation, as evidenced by increases in soil TOC in  
 366 large and small macroaggregates (Fig. 5). Thus, biochar application has a longer-term favorable  
 367 influence on aggregate stability, prevents the humus layer from becoming thinner, and provides a  
 368 theoretical basis for future surface runoff and soil erodibility reduction. Our findings were in  
 369 contrast with those of Zhou et al. (2019), who discovered neutral or even antagonistic effects on soil  
 370 aggregate formation and stabilization due to fewer binding agents produced during the  
 371 decomposition of recalcitrant biochar. Therefore, there were variations in the soil aggregations in



372 response to biochar due to the initial SOC, clay content, biochar attributes, application rate, and  
373 other factors (Peng et al. 2015). As a result, the evaluation results should be thoroughly examined,  
374 taking into account these factors as well as the effect of time in the field.

375 Biochar and N fertilizer had a synergistic effect on soil aggregate stability according to the  
376 two-factor ANOVA (Table 2). This could be because biochar combined with N fertilizer promotes  
377 crop root growth, improves crop root fungi reproductive capacity, and promotes crop roots and  
378 mycelia in the soil (Islam et al. 2021). The improved aggregates stability is due to a combination of  
379 increased root activity and biochar's significant role as a soil particle binding agent (Wang et al.  
380 2019).

#### 381 *4.3 The effects of biochar combined with nitrogen fertilizer on the total organic carbon*

382 In this investigation, the TOC level of the Mollisols increased significantly following biochar  
383 application, which is consistent with the results of Dong et al. (2016). More recently, Shi et al. (2020)  
384 proposed that the combined application of biochar and nitrogen fertilizer was conducive to soil  
385 carbon sequestration, with the cumulative mineralization rate of TOC decreasing by 0.6–1.1% when  
386 compared to the CK treatment. These findings can be interpreted in three ways. First, the use of  
387 biochar increased soil microbial activity (Fig. 7) and crop yields, thereby promoting further  
388 degradation and transformation of the plant residues, increasing SOC (Lin et al. 2020). Second,  
389 when added to the soil, biochar with a high organic carbon concentration (34.9%) directly improved  
390 the soil organic matter content. Xiu et al. (2019) found similar results in Albic soil. Third, the  
391 enrichment degree of the organic carbon occluded within the macroaggregates (Fig.5, 6) was higher  
392 than that in the microaggregates, which promoted carbon fixation in the soil aggregates (Zhang et



al. 2018). The fourth explanation is that biochar has a high inert carbon content, which increased the  $G_m^+/G_m^-$  (Fig. 7) in the decomposition of persistent and complex substrates, indicating that carbon accumulation was greater than carbon decomposition (Dong et al. 2020). Thus, biochar effectively prevented the bulk TOC in the Mollisols from decreasing.

In this study, the TOC concentration was positively correlated with the proportion of large aggregate size (Fig. 5), which is consistent with the aggregate hierarchy model proposed by Tisdall (1982). Figure 6 shows that the  $> 0.053$  mm fractions had a much higher carbon content than silt and clay, especially in the 0.25–2 mm fraction. Our findings confirmed those of Du et al. (2017) and Dong et al. (2016).

These results showed that the C+N1/2 treatment was more economically efficient. Under the C+N1/2 treatment, the carbon of the  $< 0.053$  mm aggregates in the 0–20 and 20–40 cm soil layers decreased significantly, which could be explained by the finding of Ying (2018) that N fertilization promoted the mineralization rates of primary organic carbon by affecting the soil microbial community. Overall, the C+N treatment had no advantage over the C+N1/2 treatment in terms of increasing the organic carbon content of soil aggregates. This could be due to the high N content, which caused an imbalance in the soil C/N ratio, affecting the breakdown and turnover of soil organic matter (Kimetu et al. 2010).

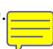

#### 4.4 The effects of biochar combined with nitrogen fertilizer on microbial community biomass and structure

Biochar can alleviate the negative effects of soil structure and function degradation on soil microbial activities, particularly when applied in conjunction with nitrogen fertilizer (Oksana et al.





2022). According published research biochar addition alone did not change the microbial community structure in spring maize fields or rice paddy fields, but when combined with fertilizer, the structure was changed (Luo et al. 2017; Tian et al. 2016). These findings are consistent with our experimental results. Soil F/B and total PLFA contents were significantly increased following biochar and N fertilizer treatments, which may be accompanied by increased SOC and N cycling and mineralization rates (Khadem et al. 2021). The higher the ratio of PLFA of soil fungi to bacteria, the more stable the soil ecosystem (Thiet et al. 2006). Compared to  $Gm^-$  bacteria,  $Gm^+$  bacteria generally possess a greater proportion of peptidoglycan, which is a relatively decay-resistant soil organic matter (Zhang et al. 2013). The high  $Gm^+/Gm^-$  bacteria ratio means that SOC accumulation is higher than mineralization (Wang et al. 2017). Therefore, the effect of biochar and organic fertilizer application on microbial community structure may be more inclined to the retention of easily decomposed organic carbon in northeast Mollisols (Jiang et al. 2016).

The RDA showed that the number of fungi, bacteria, actinomycetes,  $Gm^+$  bacteria, and  $Gm^-$  bacteria was positively related to the fraction of large aggregates and negatively linked to the soil bulk density. The RDA showed that the number of fungi, bacteria, actinomycetes,  $Gm^+$  bacteria, and  $Gm^-$  bacteria was positively related to the fraction of large aggregates and negatively linked to the soil bulk density. Also, Yuan et al. (2015) and Zheng et al. (2020) found that mycelial growth and mycelial products secretion by fungi can help stabilize soil aggregates. Consequently, increased fungal abundance has been proposed as an important biological factor in soil aggregate formation.

Previous research has shown that aggregates stability and the SOC are the most important components in microbial communities (Zhang et al. 2021). In addition, our results showed that the



435 mutual effects of biochar and half-N fertilizer could effectively affect the abundance of  
436 microorganisms, which is attributed to the increased soil C/N content as a result of the applied N  
437 fertilizer providing more N sources for microbial decomposition and organic matter utilization (Jia  
438 et al. 2020). These findings were consistent with those of Zhang et al. (2021), who discovered that  
439 combining biochar with fertilizer significantly increased microbial abundance in the soil sample,  
440 implying that the addition of inorganic fertilizer reduced crop N limitation and microbial N  
441 immobilization. Furthermore, the TOC and C/N affected the fungal community composition, most  
442 likely because fungi were the primary decomposers of TOC (Chen et al. 2013). This conclusion is  
443 further confirmed by Sekaran et al. (2019), who found that the amount of soil microbial PLFAs and  
444 the ratio of soil carbon to nitrogen were strongly and positively correlated, but biochar and a full  
445 dose of N fertilizer had little effect. Based on the sequestration of SOC and the sustainability and  
446 stability of the ecosystem, we selected the most reasonable biochar ratio (C3N1/2).

## 447 **5 Conclusion**

448 The field experiments showed that the porous structure of biochar and its carbon source can  
449 effectively improve soil structure and carbon storage. Biochar significantly increased the proportion  
450 of large soil aggregates and the stability of soil aggregates. The combined application of biochar  
451 and nitrogen fertilizer provided an abundance of living space and nutrients for soil microorganisms,  
452 but microbial activity and abundance were limited by carbon input and soil nitrogen availability.  
453 The effect of excessive N application was unsatisfactory, which affects the further improvement of  
454 soil microbial abundance. The PCA showed that the C2N1/2 treatment provided the best fertilizer  
455 application rate in this experimental area. Thus, the combination of biochar and nitrogen fertilizer



456 reduction is the optimal strategy for improving Mollisols fertility and promoting the sustainable  
457 development of the agroecosystem. Further research is needed to explore the cumulative effect of  
458 the combined application on the soil physical and chemical properties, as well as crop yield.

#### 459 **Credit authorship contribution statement**

460 Jing Sun: Investigation, Experimentation, Data collection and analysis, manuscript writing.  
461 Xinrui Lu and Guoshuang Chen: Revise the manuscript. Xiujun Li: Concept and design, Project  
462 administration, Funding acquisition. Nana Luo and Qilin Zhang: Investigation, Material preparation,  
463 and Experimentation. The final manuscript was read and approved by all of the authors.

#### 464 **Acknowledgement**

465 We thank Ezemaduka Anastasia Ngozi (Northeast institute of Geography and Agroecology, Chinese  
466 Academy of Sciences) for her editorial assistance. This work was supported by research grants from the  
467 the Strategic Priority Research Program of the Chinese Academy of Sciences (No. XDA28020400),  
468 National Natural Science Foundation of China (No. 41877024), and Key Laboratory Foundation of  
469 Mollisols Agroecology of the Chinese Academy of Sciences (2020ZKHT-05).

#### 470 **Declaration of Competing Interest**

471 The authors declare no conflict of interest.

#### 472 **References**

473 An, N., Zhang, L., Liu, Y., Shen, S., Li, N., Wu, Z., et al.: Biochar application with reduced chemical  
474 fertilizers improves soil pore structure and rice productivity. Chemosphere 298.  
475 <https://doi.org/10.1016/j.chemosphere.2022.134304>, 2022.

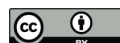

- 476 Aneseyee, A. B., Wolde, T.: Effect of biochar and inorganic fertilizer on the soil properties and  
 477 growth and yield of onion (*Allium cepa*) in tropical Ethiopia. Scientific World Journal.  
 478 5582697, 9. <https://doi.org/10.1155/2021/5582697>, 2021.
- 479 Antonello B., Fabio T., Johan B.: Refining physical aspects of soil quality and soil health when  
 480 exploring the effects of soil degradation and climate change on biomass production: an  
 481 Italian case study. SOIL, 5, 1–14. <https://doi.org/10.5194/soil-5-1-2019>, 2019.
- 482 Antonietti S.: Effect of biochar amendment on soil carbon balance and soil microbial activity. Soil  
 483 Biology and Biochemistry, 41(6), 1301-1310. <https://doi.org/10.1016/j.soilbio.2009.03.016>,  
 484 2009.
- 485 Baiamonte, G., Pasquale, C. D., Marsala, V., G Cimò, Alonzo G, Crescimanno G.: Structure  
 486 alteration of a sandy-clay soil by biochar amendments. Journal of Soils & Sediments 15(4),  
 487 816-824. <https://doi.org/10.1007/s11368-014-0960-y>, 2015.
- 488 Bottinelli, N., Angers, D. A., Hallaire, V., Michot, D., Guillou, C. L., Cluzeau, D.: Tillage and  
 489 fertilization practices affect soil aggregate stability in a humic cambisol of northwest France.  
 490 Soil and Tillage Research 170, 14-17. <https://doi.org/10.1016/j.still.2017.02.008>, 2017.
- 491 Chaganti, V. N., Crohn D. M.: Evaluating the relative contribution of physicochemical and  
 492 biological factors in ameliorating a saline-sodic soil amended with composts and biochar  
 493 and leached with reclaimed water. Geoderma 259-260, 45-55.  
 494 <https://doi.org/10.1016/j.geoderma.2015.05.005>, 2015.
- 495 Chen, J., Chen, D., Xu, Q., Fuhrmann, J. J., Sun, X.: Organic carbon quality, the composition of  
 496 main microbial groups, enzyme activities, and temperature sensitivity of soil respiration of



- 497 an acid paddy soil treated with biochar. *Biology & Fertility of Soils* 55(2).  
 498 <http://dx.doi.org/10.1007/s00374-018-1333-2>, 2018.
- 499 Chen, J., Liu, X., Zheng, J., Zhang, B., Yu, X.: Biochar soil amendment increased bacterial but  
 500 decreased fungal gene abundance with shifts in community structure in a slightly acid rice  
 501 paddy from southwest China. *Applied Soil Ecology* 71, 33–44.  
 502 <http://dx.doi.org/10.1016/j.apsoil.2013.05.003>, 2013.
- 503 Chen, J., Sun, X., Zheng, J., Zhang, X., Liu, X., Bian, R.: Biochar amendment changes the  
 504 temperature sensitivity of soil respiration and composition of microbial communities 3  
 505 years after incorporation in an organic carbon-poor dry cropland soil. *Biology & Fertility*  
 506 *of Soils*. <http://dx.doi.org/10.1007/s00374-017-1253-6>, 2018.
- 507 Chen, L., Li, X., Peng, Y., Xiang, P., Zhou, Y., Yao, B.: Co-application of biochar and organic  
 508 fertilizer promotes the yield and quality of red pitaya (*Hylocereus polyrhizus*) by improving  
 509 soil properties. *Chemosphere* 294, 133619.  
 510 <https://doi.org/10.1016/j.chemosphere.2022.133619>, 2022.
- 511 Chen, Y., M., Xu, X., Jiao X., G., et al.: Responses of labile organic nitrogen fractions and enzyme  
 512 activities in eroded mollisols after 8-year manure amendment. *Scientific Reports*.  
 513 <https://doi.org/10.1038/s41598-018-32649-y>, 2018.
- 514 Demisie, W., Liu, Z., Zhang, M.: Effect of biochar on carbon fractions and enzyme activity of red  
 515 soil. *Catena* 121:214–221. <https://doi.org/10.1016/j.catena.2014.05.020>, 2014.



- 516 Dong, D., Wang, C., Zwieten, L. V., Wang, H., Wu, W.: An effective biochar-based slow-release  
 517 fertilizer for reducing nitrogen loss in paddy fields. *Journal of Soils & Sediments*  
 518 20(8):3027-3040. <https://doi.org/10.1007/s11368-019-02401-8>, 2020.
- 519 Dong, X., Guan, T., Li, G., Lin Q, Zhao, X.: Long-term effects of biochar amount on the content  
 520 and composition of organic matter in soil aggregates under field conditions. *Journal of Soils*  
 521 & *Sediments* 16(5), 1481-1497. <http://dx.doi.org/10.1007/s11368-015-1338-5>, 2016.
- 522 Du, Z. L., Zhao, J. K., Wang, Y. D.: Biochar addition drives soil aggregation and carbon  
 523 sequestration in aggregate fractions from an intensive agricultural system. *Journal of Soil*  
 524 & *Sediments*. <http://dx.doi.org/10.1007/s11368-015-1349-2>, 2017.
- 525 E. -L. Ng, Patti, A., F., Rose, M., T., Schefe, et al.: Does the chemical nature of soil carbon drive the  
 526 structure and functioning of soil microbial communities? *Soil Biology and Biochemistry*.  
 527 70 (2014) 54-61. <http://dx.doi.org/10.1016/j.soilbio.2013.12.004>, 2014.
- 528 Eswaran, H., Reich, P., Padmanabhan, E.: *World soil resources: opportunities and challenges*. CRC  
 529 Press, Taylor and Francis Group. 29–52, 2011
- 530 Fungo, B., Lehmann, J., Kalbitz, K., Thion, O, M., Okeyo, I., Tenywa, M.: Aggregate size  
 531 distribution in a biochar-amended tropical ultisol under conventional hand-hoe tillage. *Soil*  
 532 & *Tillage Research* 165, 190-197. <https://doi.org/10.1016/j.still.2016.08.012>, 2017.
- 533 Grunwald, D., Kaiser, M., Ludwig, B.: Effect of biochar and organic fertilizers on C mineralization  
 534 and macro-aggregate dynamics under different incubation temperatures. *Soil & Tillage*  
 535 *Research* 3612(7). <http://dx.doi.org/10.1016/j.still.2016.01.00>, 2016.



- 536 He, M., Xiong, X., Wang, L.: A critical review on performance indicators for evaluating soil biota  
 537 and soil health of biochar-amended soils. *Journal of Hazardous Materials* 414(20):125378.  
 538 <https://doi.org/10.1016/j.jhazmat.2021.125378>, 2021.
- 539 Islam, M. U., Jiang, F., Guo, Z., Peng, X.: Does biochar application improve soil aggregation? A  
 540 meta-analysis. *Soil & Tillage Research* 209, 104926.  
 541 <https://doi.org/10.1016/j.still.2020.104926>, 2021.
- 542 Jia, X., Zhong, Y., Liu, J., Zhu, G., Shang, G. Z., Yan, W.: Effects of nitrogen enrichment on soil  
 543 microbial characteristics: from biomass to enzyme activities. *Geoderma* 366, 114256.  
 544 <https://doi.org/10.1016/j.geoderma.2020.114256>, 2020.
- 545 Jiang, X. Y., Karolien, Denef., Catherine, E., et al.: Controls and dynamics of biochar decomposition  
 546 and soil microbial abundance, composition, and carbon use efficiency during long-term  
 547 biochar-amended soil incubations. *Biology & Fertility of Soils* 52, 1–14.  
 548 <https://doi.org/10.1007/s00374-015-1047-7>, 2016.
- 549 Joseph, S. D., Camps-Arbestain M., Lin, Y., Munroe P., Chiaa, C. H.: An investigation into the  
 550 reactions of biochar in soil. *Soil Research* 48(7), 501-515.  
 551 <http://dx.doi.org/10.1071/SR10009>, 2010.
- 552 Khadem, A., Raiesi, F., Besharati, H., Khalaj, M. A.: The effects of biochar on soil nutrients status,  
 553 microbial activity, and carbon sequestration potential in two calcareous soils. *Biochar*, 3(1),  
 554 12:105–116. <https://doi.org/10.1007/s42773-020-00076-w>, 2021.

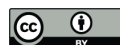

- 555 Kimetu, J. M., Lehmann, J.: Stability and stabilization of biochar and green manure in soil with  
 556 different organic carbon contents. *Soil Research* 48(7), 577-585.  
 557 <https://doi.org/10.1071/SR10036>, 2010.
- 558 Kung, C. C., Kong, F., Choi, Y.: Pyrolysis and biochar potential using crop residues and agricultural  
 559 wastes in China. *Ecological Indicators* 51, 139-145.  
 560 <https://doi.org/10.1016/j.ecolind.2014.06.043>, 2015.
- 561 Li, C. Z., Zhang, H., Yao, W. J., Xu, C., Wu, D., Wang, J. D., Ai, Y. C., Zhang, Y. C.: Effects of  
 562 biochar application combined with nitrogen fertilizer on soil physicochemical properties  
 563 and winter wheat yield in the typical ancient region of the yellow river, China. *Chinese*  
 564 *Journal of Applied Ecology* 31(10), 3424-3432. [https://doi.org/10.13287/j.1001-](https://doi.org/10.13287/j.1001-9332.202010.028)  
 565 [9332.202010.028](https://doi.org/10.13287/j.1001-9332.202010.028), 2020.
- 566 Li, F., Qiu, P., Shen, B., Shen, Q.: Soil aggregate size modifies the impacts of fertilization on  
 567 microbial communities. *Geoderma* 343, 205-214.  
 568 <http://dx.doi.org/10.1016/j.geoderma.2019.02.039>, 2019.
- 569 Li, L. C., Yang, M. Y., Li J. C., Bol, Roland, Du Z. L., Wu D.: Potential denitrification activity  
 570 response to long-term nitrogen fertilization- A global meta-analysis. *Journal of Cleaner*  
 571 *Production* 336:130451. <https://doi.org/10.1016/j.jclepro.2022.130451>, 2022.
- 572 Li, L.J., Burger, M., Du, S.L., Zou, W.X., You, M.Y., Hao, X.X., Lu, X.C., Zheng, L., Han, X.Z.:  
 573 Change in soil organic carbon between 1981 and 2011 in croplands of Heilongjiang  
 574 Province, northeast China. *Journal of the Science of Food and Agriculture*, 96: 1275-1283,  
 575 2016.





- 576 Lin, H. Y., Zhou, M. H., Zhang, Bowen., et al.: Effects of long-term application of biochar and straw  
 577 on soil aggregate organic carbon in purple slope farmland. Chinese Journal of Eco-  
 578 Agriculture 28(1):8, 2020.
- 579 Luo, C., Yang, J., Chen, W., Han, F.: Effect of biochar on soil properties on the Loess Plateau:  
 580 Results from field experiments. Geoderma 369:114323.  
 581 <https://doi.org/10.1016/j.geoderma.2020.114323>, 2020.
- 582 Luo, S., Wang, S., Tian, L., Li, S., Li, X., Shen, Y. et al.: Long-term biochar application influences  
 583 soil microbial community and its potential roles in semiarid farmland. Applied Soil Ecology  
 584 117-118, 10-15. <https://doi.org/10.1016/j.apsoil.2017.04.024>, 2017.
- 585 Madari, B. E., Silva, M., Carvalho, M., Maia, A., Petter, F. A., Santos, J., et al.: Properties of a sandy  
 586 clay loam haplic ferralsol and soybean grain yield in a five-year field trial as affected by  
 587 biochar amendment. Geoderma 305, 100-112.  
 588 <http://dx.doi.org/10.1016/j.geoderma.2017.05.029>, 2017.
- 589 Mei, N., Zhang, X., Wang, X., Peng, C., Gu, Y.: Effects of 40 years of applications of inorganic and  
 590 organic fertilization on soil bacterial community in a maize agroecosystem in northeast  
 591 china. European Journal of Agronomy 130(4), 126332.  
 592 <https://doi.org/10.1016/j.eja.2021.126332>, 2021.
- 593 Mete, F. Z., Mia, S., Dijkstra, F. A., Abuyusuf, M., Hossain, A., Agronomy, D. O.: Synergistic  
 594 Effects of Biochar and NPK Fertilizer on Soybean Yield in an Alkaline Soil. Pedosphere  
 595 25(05),713-719. [https://doi.org/10.1016/S1002-0160\(15\)30052-7](https://doi.org/10.1016/S1002-0160(15)30052-7), 2015.



- 596 Oksana, Coban, Gerlinde, B. De Deyn., Martine, van der Ploeg: Soil microbiota as game-changers  
 597 in the restoration of degraded lands. *Restoration Ecology* 375(6584).  
 598 <https://doi.org/10.1126/science.abe0725>, 2022.
- 599 Palansooriya, K. N., Wong, J., Hashimoto, Y., Huang, L., Rinklebe, J., Chang, S. X.: Response of  
 600 microbial communities to biochar-amended soils: a critical review. *Biochar*.  
 601 <https://doi.org/10.1007/s42773-019-00009-2>, et al. 2019.
- 602 Peng, X., Horn, R., Hallett, P.: Soil structure and its functions in ecosystems: phase matter & scale  
 603 matter. *Soil & Tillage Research* 146, 1-3. <http://dx.doi.org/10.1016/j.still.2014.10.017>,  
 604 2015.
- 605 Plaza, C., Giannetta, B., Fernández, J., M., López-de-Sá, Esther G., Polo, A., Gascó, G., et al.:  
 606 Response of different soil organic matter pools to biochar and organic fertilizers.  
 607 *Agriculture Ecosystems & Environment* 225:150-159. 10.1016/j.agee.2016.04.014, 2016.
- 608 Scow, Kate, M., Parikh, Sanjai, J.: Biochar additions can enhance soil structure and the physical  
 609 stabilization of C in aggregates. *Geoderma* 303: 110-117.  
 610 <https://doi.org/10.1016/j.geoderma.2017.05.027>, et al. 2017.
- 611 Sekaran, U., Sandhu, S. S., Qiu, Y., Kumar, S., Hernandez, J.: Biochar and manure addition  
 612 influenced soil microbial community structure and enzymatic activities at eroded and  
 613 depositional landscape positions. *Land Degradation & Development* (5).  
 614 <https://doi.org/10.1002/ldr.3508>, 2019.
- 615 Shi, D. L., Wang, X. L., Duan, J. J., et al.: Effects of nitrogen reduction combined with biochar  
 616 application on soil organic carbon active components and mineralization in yellow soil



- 617           paddy field. Chinese Journal of Applied Ecology 31(12):8. [https://doi.org/10.13287/j.1001-](https://doi.org/10.13287/j.1001-9332.202012.027)  
 618           [9332.202012.027](https://doi.org/10.13287/j.1001-9332.202012.027), 2020.
- 619       Song, D., Chen, L., Zhang, S., Zheng, Q., Wang, X.: Combined biochar and nitrogen fertilizer  
 620           change soil enzyme and microbial activities in a 2-year field trial. European Journal of Soil  
 621           Biology 99, 103212. <https://doi.org/10.1016/j.ejsobi.2020.103212>, 2020.
- 622       Thiet, R. K., Frey S. D., Six, J.: Do growth yield efficiencies differ between soil microbial  
 623           communities differing in fungal: bacterial ratios? Reality check and methodological issues.  
 624           Soil Biology and Biochemistry, 38: 837-844. <https://doi.org/10.1016/j.soilbio.2005.07.010>,  
 625           2006.
- 626       Tian, J., Wang, J., Dippold, M., Gao, Y., Blagodatskaya, E., Kuzyakov, Y.: Biochar affects soil  
 627           organic matter cycling and microbial functions but does not alter microbial community  
 628           structure in paddy soil. Sci. Total Environ 556, 89–97.  
 629           <https://doi.org/10.1016/j.scitotenv.2016.03.010>, 2016.
- 630       Tisdall, JM., Oades, JM.: Organic matter and water-stable aggregates in soils. Journal of Soil  
 631           Science 32-2. <https://doi.org/10.1111/j.1365-2389.1982.tb01755.x>, 1982.
- 632       Trivedi, P., Delgado-Baquerizo, M., Jeffries, T. C., Trivedi, C., Anderson, I. C., Mcnee, M. et al.:  
 633           Soil aggregation and associated microbial communities modify the impact of agricultural  
 634           management on carbon content. Environmental Microbiology 19(8).  
 635           <https://doi.org/10.1111/1462-2920.13779>, 2017.
- 636       Wang, C., Chen, D., Shen, J., Yuan, Q., Wu, J.: Biochar alters soil microbial communities and  
 637           potential functions 3–4 years after amendment in a double rice cropping system.



- 638 Agriculture Ecosystems & Environment 311(4), 107291.  
 639 <https://doi.org/10.1016/j.agee.2020.107291>, 2021.
- 640 Wang, C., Jiang, K., Lu, Y. et al.: Effects of different organic materials application on aggregate  
 641 composition and stability of latosol. Soil Science 50(6):7.  
 642 <https://doi.org/10.19336/j.cnki.trtb.2019.06.10>, 2019.
- 643 Wang, H. Y., Nie, Y., Clayton R. B., Wang, L., Chen, Q. H., et al.: Fertilization alters microbial  
 644 community composition and functional patterns by changing the chemical nature of soil  
 645 organic carbon: A field study in a Halosol. Geoderma. 292 (2017) 17–24.  
 646 <http://dx.doi.org/10.1016/j.geoderma.2017.01.006>, 2017.
- 647 Wang, R. F., Zhang, J. W., Dong, S. T., Liu, P.: The present situation of maize straw resource  
 648 utilization and its effect in main maize production regions of china. Chinese Journal of  
 649 Applied Ecology 22(6), 1504-1510, 2011.
- 650 Weyers, S. L., Spokas, K. A.: Impact of biochar on earthworm populations: a review. Applied &  
 651 Environmental Soil Science 2011, 1-12. <http://dx.doi.org/10.1155/2011/541592>, 2011.
- 652 Xiu, L., Zhang, W., Sun, Y. et al.: Effects of biochar and straw returning on the key cultivation  
 653 limitations of Albic soil and soybean growth over 2 years. Catena 173:481-493.  
 654 <https://doi.org/10.1016/j.catena.2018.10.041>, 2019.
- 655 Xiu, L., Zhang, W., Wu, D. et al.: Biochar can improve biological nitrogen fixation by altering the  
 656 root growth strategy of soybean in Albic soil. Science of The Total Environment  
 657 773(1):144564. <https://doi.org/10.1016/j.scitotenv.2020.144564>, 2021.



- 658 Xu, G., Song, J., Zhang, Y., Lv, Y.: Effects of Biochar Application on Soil Organic Carbon  
 659 Mineralization during Drying and Rewetting Cycles. *Bioresources* 14(4) 9957-9967, 2019.
- 660 Xue, B., Huang, L., Huang, Y., et al.: Straw management influences the stabilization of organic  
 661 carbon by Fe (oxyhydr) oxides in soil aggregates. *Geoderma* 358.  
 662 <https://doi.org/10.1016/j.geoderma.2019.113987>, 2019.
- 663 Yin, D. W., Shi, M. J., et al.: Biochar as a tool to improve physicochemical properties of Chinese  
 664 albic soils. *Journal of Biobased Materials and Bioenergy* 12(1), 102-108.  
 665 <https://doi.org/10.1166/jbmb.2018.1735>, 2018.
- 666 Ying, D.: Effects of heavy metal pollution on organic carbon mineralization and microbial  
 667 community structure in paddy soil under corn stalk addition. Nanjing Agricultural  
 668 University, 2018.
- 669 Yuan, J. J., Tong, Y. A., Lu, S. H., Yuan, G. J.: Effects of combined application of biochar and  
 670 nitrogen fertilizer on soil fertility, yield, and quality of Chinese jujube. *Plant Nutrition and*  
 671 *Fertilizer Science*, 23(2), 8. <https://doi.org/10.11674/zwyf.16285>, 2017.
- 672 Yuan, Y. R., Zhang, B., Han, X. Z., et al.: Higher rates of manure application lead to greater  
 673 accumulation of both fungal and bacterial residues in macroaggregates of clay soil. *Soil*  
 674 *Biology & Biochemistry*. <https://doi.org/10.1016/j.soilbio.2015.02.015>, 2015.
- 675 Zhang, H. J., Ding, W., X., Yu, H., Y., He, X., H.: Carbon uptake by a microbial community during  
 676 30-day treatment with <sup>13</sup>C-glucose of a sandy loam soil fertilized for 20 years with NPK  
 677 or compost as determined by a GC–C–IRMS analysis of phospholipid fatty acids. *Soil*



678 Biology and Biochemistry. 57 (2013) 228e236.  
 679 <https://doi.org/10.1016/j.soilbio.2012.08.024>, 2013.  
 680 Zhang, Q., Du, Z. L., Lou, Y., He, X.: A one-year short-term biochar application improved carbon  
 681 accumulation in large macroaggregate fractions. Catena 127, 26-31.  
 682 <https://doi.org/10.1016/j.catena.2014.12.009>, 2015.  
 683 Zhang, S., Cui, J., Wu, H., Zheng, Q., Zhang, S.: Organic carbon, total nitrogen, and microbial  
 684 community distributions within aggregates of calcareous soil treated with biochar.  
 685 Agriculture Ecosystems & Environment 314:107408.  
 686 <https://doi.org/10.1016/j.agee.2021.107408>, 2021.  
 687 Zhang, Y., Li, X., Gregorich, E. G., McLaughlin, N. B., Liang, A.: Evaluating storage and pool size  
 688 of soil organic carbon in degraded soils: tillage effects when crop residue is returned. Soil  
 689 and Tillage Research 192, 215-221. <https://doi.org/10.1016/j.still.2019.05.013>, 2019.  
 690 Zhang, Y., Li, X., Gregorich, E. G., McLaughlin, N. B., Zhang, X., Guo, Y., et al.: No-tillage with  
 691 continuous maize cropping enhances soil aggregation and organic carbon storage in  
 692 northeast china. Geoderma 330, 204-211. <https://doi.org/10.1016/j.geoderma.2018.05.037>,  
 693 2018.  
 694 Zhang, Z. M., Jun, Y., Han, X. Z., Zou, W. X., et al.: Labile organic carbon fractions drive soil  
 695 microbial communities after long-term fertilization. Global Ecology and Conservation  
 696 32(2021) e01867. <https://doi.org/10.1016/j.gecco.2021.e01867>, 2021.



697 Zheng, W., Zhao, Z., Lv, F., Yin, Y., Zhai, B.: Fungal alpha diversity drives the stochasticity of  
698 bacterial and fungal community assembly in soil aggregates in the apple orchard. Soil  
699 sampling and aggregate fractionation. <http://dx.doi.org/10.21203/rs.3.rs-56672/v1>, 2020.  
700 Zhou, H., Fang, H., Zhang, Q., Wang, Q., Chen, C., Mooney, S. J., Peng, X. H., Du, Z. L.: Biochar  
701 enhances soil hydraulic function but not soil aggregation in a sandy loam. Eur. J. Soil Sci  
702 70, 291–300. <https://doi.org/10.1111/ejss.12732>, 2019.
